# Supplementary material
Source: PubMed Central journal article supplement (PMC6071739)
Supplement: EHP1837.s001.acco.pdf [file EHP1837.s001.acco.pdf]

**Note to readers with disabilities:** *EHP* strives to ensure that all journal content is accessible to all readers. However, some figures and Supplemental Material published in *EHP* articles may not conform to [508 standards](#) due to the complexity of the information being presented. If you need assistance accessing journal content, please contact [ehp508@niehs.nih.gov](mailto:ehp508@niehs.nih.gov). Our staff will work with you to assess and meet your accessibility needs within 3 working days.

### **Supplemental Material**

#### **Evaluating the Association between Artificial Light-at-Night Exposure and Breast and Prostate Cancer Risk in Spain (MCC-Spain Study)**

Ariadna Garcia-Saenz, Alejandro Sánchez de Miguel, Ana Espinosa, Antonia Valentin, Nùria Aragonés, Javier Llorca, Pilar Amiano, Vicente Martín Sánchez, Marcela Guevara, Rocío Capelo, Adonina Tardón, Rosana Peiró-Perez, José Juan Jiménez-Moleón, Aina Roca-Barceló, Beatriz Pérez-Gómez, Trinidad Dierssen-Sotos, Tania Fernández-Villa, Conchi Moreno-Iribas, Victor Moreno, Javier García-Pérez, Gemma Castaño-Vinyals, Marina Pollán, Martin Aubé, and Manolis Kogevinas

#### **Table of Contents**

**Table S1.** Distribution of potential breast and prostate cancer risk factors among the total non-shift workers MCC-Spain population, included in the indoor light-at-night (ALAN) model.

**Table S2.** Associations of Indoor and Outdoor artificial light-at-night (ALAN) with breast cancer among non-shift workers from Barcelona and Madrid (MCC-Spain) by menopausal status.

**Table S3.** Association of Indoor artificial light-at-night (ALAN) with breast and prostate cancer, in the total non-shift workers MCC-Spain population.

**Table S4.** Association of Indoor and Outdoor artificial light-at-night (ALAN) when sleeping, with breast and prostate cancer including shift workers MCC-Spain participants of Madrid and Barcelona.

**Table S5.** Association of Indoor artificial light-at-night (ALAN) with breast and prostate cancer, in the total non-shift workers MCC-Spain population by chronotype.

**Figure S1.** Classification of the ground level spectral type of the lamps using the green to the red bands (G/R) ratio, to estimate the ground based spectrum of the melatonin suppression index (MSI). The colours indicate the visual colour of the street lights with independently of the technology used: Red/diagonal lines: monochromatic orange lights, orange/dotted: no monochromatic orange lights, yellow/diagonal square net: very warm white lights, cyan/horizontal square net: white lights; dark blue/black circles with a white dot: white bluish lights; green/stars: greenish-white lights. CFL and FL are shown with the same symbol because they have the same spectral features. The diagonal line is the RANSAC linear fit to the points.

**Figure S2.** Relationship between the ratio of the photopic visual light over the green band fluxes detected from the ISS ( $V(\lambda)/G$ ) to the ratio of the green to the red bands (G/R) also detected from the ISS image to classify the lamp type. Colors indicate the visual color of the street lights independently of the technology used: red/diagonal lines: monochromatic orange lights, orange/dotted: no monochromatic orange lights, yellow/diagonal square net: very warm white lights, cyan/horizontal square net: white lights; dark blue/black circles with a white dot: white bluish lights; green/stars: greenish-white lights. The red line is a polynomial fit.

Table S1. Distribution of potential breast and prostate cancer risk factors among the total non-shift workers MCC-Spain population, included in the indoor light-at-night (ALAN) model.

| Characteristic                                    | Breast cancer    |               | Prostate cancer  |               |
|---------------------------------------------------|------------------|---------------|------------------|---------------|
|                                                   | Controls<br>N(%) | Cases<br>N(%) | Controls<br>N(%) | Cases<br>N(%) |
| <b>Age (years); mean (SD)</b>                     | 58.8 (12.6)      | 55.8 (11.8)   | 66.1 (8.3)       | 65.6 (7)      |
| <b>Educational level</b>                          |                  |               |                  |               |
| Less than primary school                          | 213 (15.4)       | 158 (13)      | 125 (14.2)       | 111 (17.8)    |
| Primary school                                    | 438 (31.6)       | 410 (33.6)    | 259 (29.5)       | 249 (40)      |
| Secondary school                                  | 446 (32.2)       | 417 (34.2)    | 268 (30.5)       | 146 (23.4)    |
| University                                        | 288 (20.8)       | 234 (19.2)    | 227 (25.8)       | 117 (18.8)    |
| <b>Socioeconomic score<sup>a</sup></b>            |                  |               |                  |               |
| Low                                               | 392 (29.3)       | 357 (29.3)    | 231 (28.1)       | 246 (39.5)    |
| Medium                                            | 711 (53.1)       | 675 (55.4)    | 424 (51.6)       | 300 (48.2)    |
| High                                              | 237 (17.7)       | 187 (15.3)    | 166 (20.2)       | 77 (12.4)     |
| <i>N missing values</i>                           | 45               | 0             | 58               | 0             |
| <b>Urban vulnerability; mean (SD)<sup>b</sup></b> | .5 (.2)          | .5 (.1)       | .5 (.2)          | .5 (.2)       |
| <b>BMI</b>                                        |                  |               |                  |               |
| <25                                               | 702 (50.7)       | 586 (48.1)    | 232 (26.4)       | 162 (26.0)    |
| 25-30                                             | 434 (31.3)       | 415 (34.0)    | 451 (51.3)       | 325 (52.2)    |
| >=30                                              | 249 (18)         | 218 (17.9)    | 196 (22.3)       | 136 (21.8)    |
| <b>Smoking (ever)<sup>c</sup></b>                 |                  |               |                  |               |
| No                                                | 578 (41.8)       | 546 (44.9)    | 644 (73.3)       | 467 (75.0)    |
| Yes                                               | 806 (58.2)       | 671 (55.1)    | 235 (26.7)       | 156 (25.0)    |
| <i>N missing values</i>                           | 1                | 2             | 0                | 0             |
| <b>Family history of breast/prostate cancer</b>   |                  |               |                  |               |
| No                                                | 1255 (90.6)      | 1039 (85.2)   | 822 (93.5)       | 520 (83.5)    |
| Yes                                               | 130 (9.4)        | 180 (14.8)    | 57 (6.5)         | 103 (16.5)    |
| <b>Alcohol consumption; mean (SD)</b>             | 5.3 (8.6)        | 6.2 (11.3)    | 28.7 (32.0)      | 31.9 (35.4)   |
| <i>N missing values</i>                           | 183              | 189           | 99               | 79            |
| <b>Chronotype</b>                                 |                  |               |                  |               |
| Morning type                                      | 529 (38.6)       | 442 (36.7)    | 430 (50.4)       | 311 (50.1)    |
| Intermediate chronotypes                          | 554 (40.4)       | 473 (39.2)    | 316 (37.0)       | 231 (37.2)    |
| Evening type                                      | 289 (21.1)       | 291 (24.1)    | 108 (12.6)       | 79 (12.7)     |
| <i>N missing values</i>                           | 13               | 13            | 25               | 2             |
| <b>Menopausal status</b>                          |                  |               |                  |               |
| Premenopausal                                     | 391 (28.2)       | 441 (36.2)    | NA               | NA            |
| Postmenopausal                                    | 994 (71.8)       | 778 (63.8)    | NA               | NA            |
| <b>Participating centres</b>                      |                  |               |                  |               |
| Madrid                                            | 302 (21.8)       | 259 (21.2)    | 256 (29.1)       | 213 (34.2)    |
| Barcelona                                         | 268 (19.4)       | 214 (17.6)    | 320 (36.4)       | 205 (32.9)    |
| Navarra                                           | 128 (9.2)        | 158 (13.0)    | NA               | NA            |
| Guipuzcoa                                         | 176 (12.7)       | 141 (11.6)    | NA               | NA            |
| Leon                                              | 152 (11.0)       | 157 (12.9)    | NA               | NA            |

|           |           |           |            |           |
|-----------|-----------|-----------|------------|-----------|
| Asturias  | 90 (6.5)  | 48 (3.9)  | 36 (4.1)   | 7 (1.1)   |
| Murcia    | NA        | NA        | NA         | NA        |
| Huelva    | 55 (4.0)  | 73 (6.0)  | 44 (5.0)   | 28 (4.5)  |
| Cantabria | 128 (9.2) | 100 (8.2) | 108 (12.3) | 84 (13.5) |
| Valencia  | 41 (3.0)  | 38 (3.1)  | 51 (5.8)   | 51 (8.2)  |
| Granada   | NA        | NA        | 64 (7.3)   | 35 (5.6)  |
| Girona    | 45 (3.2)  | 31 (2.5)  |            |           |

<sup>a</sup>Socioeconomic score based on a combination of information on education of parents and on occupation and education of the subject

<sup>b</sup>Urban vulnerability index to measure socioeconomic status at area level coded from 0 to 1 (Ministry of Public Works, Spain 2001-2011)

<sup>c</sup>Smoking habits (ever smoked at least 100 cigarettes or 360 gr of tobacco vs. None)

NA: Not applicable

Table S2. Associations of Indoor and Outdoor artificial light-at-night (ALAN) with breast cancer among non-shift workers from Barcelona and Madrid (MCC-Spain) by menopausal status.

|                                   | Premenopausal     |                |                          | Postmenopausal    |                |                          | p-value <sup>b</sup> |
|-----------------------------------|-------------------|----------------|--------------------------|-------------------|----------------|--------------------------|----------------------|
|                                   | Controls<br>N (%) | Cases<br>N (%) | ORs (95%CI) <sup>a</sup> | Controls<br>N (%) | Cases<br>N (%) | ORs (95%CI) <sup>a</sup> |                      |
| Breast cancer (N)                 | 112               | 136            |                          | 378               | 244            |                          |                      |
| Indoor ALAN                       |                   |                |                          |                   |                |                          |                      |
| Ref= Total darkness               | 12 (10.7)         | 25 (18.4)      | 1.00                     | 47 (12.4)         | 25 (10.2)      | 1.00                     | 0.121                |
| Almost dark                       | 54 (48.2)         | 40 (29.4)      | 0.44 (0.18,1.06)         | 132 (34.9)        | 79 (32.4)      | 1.19 (0.66,2.13)         |                      |
| Dim light                         | 42 (37.5)         | 63 (46.3)      | 0.86 (0.36,2.06)         | 166 (43.9)        | 117 (48.0)     | 1.42 (0.79,2.54)         |                      |
| Quite illuminated                 | 4 (3.6)           | 8 (5.9)        | 0.80 (0.18,3.53)         | 33 (8.7)          | 23 (9.4)       | 1.31 (0.63,2.72)         |                      |
| Outdoor ALAN-Visual Light         |                   |                |                          |                   |                |                          |                      |
| Ref=1st tertile (lowest)          | 44 (39.3)         | 60 (44.1)      | 1.00                     | 113 (29.9)        | 73 (29.9)      | 1.00                     | 0.588                |
| 2 <sup>nd</sup> tertile           | 36 (32.1)         | 34 (25.0)      | 0.53 (0.27,1.02)         | 134 (35.4)        | 87 (35.7)      | 1.00 (0.66,1.51)         |                      |
| 3 <sup>rd</sup> tertile (highest) | 32 (28.6)         | 42 (30.9)      | 0.53 (0.26,1.10)         | 131 (34.7)        | 84 (34.4)      | 1.00 (0.64,1.57)         |                      |
| Outdoor ALAN-MSI (blue light)     |                   |                |                          |                   |                |                          |                      |
| Ref=1st tertile (lowest)          | 38 (33.9)         | 48 (35.3)      | 1.00                     | 126 (33.3)        | 78 (32.0)      | 1.00                     | 0.761                |
| 2 <sup>nd</sup> tertile           | 42 (37.5)         | 40 (29.4)      | 0.62 (0.32,1.18)         | 132 (34.9)        | 76 (31.1)      | 0.97 (0.63,1.50)         |                      |
| 3 <sup>rd</sup> tertile (highest) | 32 (28.6)         | 48 (35.3)      | 1.09 (0.57,2.09)         | 120 (31.7)        | 90 (36.9)      | 1.31 (0.84,2.03)         |                      |

a. Basic adjustment: age, centre and educational level.

b. P-value for interaction (LRT)

Table S3. Association of Indoor artificial light-at-night (ALAN) with breast and prostate cancer, in the total non-shift workers MCC-Spain population

|                                           | <b>Controls</b> |              | <b>Cases</b>       |              |              |                    |
|-------------------------------------------|-----------------|--------------|--------------------|--------------|--------------|--------------------|
|                                           | <b>N (%)</b>    | <b>N (%)</b> | <b>ORs (95%CI)</b> | <b>N (%)</b> | <b>N (%)</b> | <b>ORs (95%CI)</b> |
| <b>Basic adjustment (N)<sup>a</sup></b>   | 1385            | 1219         |                    | 879          | 623          |                    |
| Indoor ALAN                               |                 |              |                    |              |              |                    |
| Ref= Total darkness                       | 196 (14.2)      | 168 (13.8)   | 1.00               | 151 (17.2)   | 91 (14.6)    | 1.00               |
| Almost dark                               | 534 (38.6)      | 448 (36.8)   | 1.06 (0.82,1.36)   | 369 (42.0)   | 218 (35.0)   | 0.96 (0.69,1.34)   |
| Dim light                                 | 434 (31.3)      | 415 (34.0)   | 1.30 (1.00,1.69)   | 266 (30.3)   | 209 (33.5)   | 1.21 (0.85,1.71)   |
| Quite illuminated                         | 221 (16.0)      | 188 (15.4)   | 1.02 (0.76,1.36)   | 93 (10.6)    | 105 (16.9)   | 1.90 (1.27,2.85)   |
| <b>Further adjustment (N)<sup>b</sup></b> | 1334            | 1204         |                    | 800          | 621          |                    |
| Indoor ALAN                               |                 |              |                    |              |              |                    |
| Ref= Total darkness                       | 182 (13.6)      | 165 (13.7)   | 1.00               | 123 (15.4)   | 90 (14.5)    | 1.00               |
| Almost dark                               | 519 (38.9)      | 444 (36.9)   | 1.02 (0.79,1.31)   | 343 (42.9)   | 218 (35.1)   | 0.92 (0.64,1.31)   |
| Dim light                                 | 417 (31.3)      | 408 (33.9)   | 1.23 (0.94,1.61)   | 247 (30.9)   | 208 (33.5)   | 1.13 (0.79,1.64)   |
| Quite illuminated                         | 216 (16.2)      | 187 (15.5)   | 0.94 (0.70,1.27)   | 87 (10.9)    | 105 (16.9)   | 1.80 (1.18,2.76)   |

a. Basic adjustment: age, centre, educational level and menopausal status (in breast cancer).

b. Further adjustment: age, centre, educational level, SES, urban vulnerability index (UVI), body mass index (BMI), tobacco, family history of breast/prostate cancer and chronotype. Menopausal status (only breast cancer).

Table S4. Association of Indoor and Outdoor artificial light-at-night (ALAN) when sleeping, with breast and prostate cancer including shift workers MCC-Spain participants of Madrid and Barcelona.

| <b>Basic adjustment<sup>a</sup></b>              | <b>Breast Cancer (N=970)</b> |            |                  | <b>Prostate Cancer (N=1189)</b> |            |                  |
|--------------------------------------------------|------------------------------|------------|------------------|---------------------------------|------------|------------------|
| <b>Indoor ALAN</b>                               |                              |            |                  |                                 |            |                  |
| Ref= Total darkness                              | 67 (12.3)                    | 58 (13.7)  | 1.00             | 156 (22.6)                      | 114 (22.8) | 1.00             |
| Almost dark                                      | 204 (37.4)                   | 132 (31.1) | 0.81 (0.51,1.29) | 264 (38.3)                      | 130 (26.0) | 0.62 (0.43,0.88) |
| Dim light                                        | 228 (41.8)                   | 194 (45.8) | 1.10 (0.70,1.75) | 226 (32.8)                      | 182 (36.4) | 0.98 (0.69,1.40) |
| Quite illuminated                                | 47 (8.6)                     | 40 (9.4)   | 0.90 (0.50,1.61) | 43 (6.2)                        | 74 (14.8)  | 2.25 (1.41,3.61) |
| <b>Outdoor ALAN-Visual Light<sup>b</sup></b>     |                              |            |                  |                                 |            |                  |
| Ref=1st tertile (lowest)                         | 181 (33.2)                   | 143 (33.7) | 1.00             | 199 (28.9)                      | 198 (39.6) | 1.00             |
| 2 <sup>nd</sup> tertile                          | 182 (33.3)                   | 142 (33.5) | 1.07 (0.77,1.49) | 240 (34.8)                      | 156 (31.2) | 0.66 (0.49,0.88) |
| 3 <sup>rd</sup> tertile (highest)                | 183 (33.5)                   | 139 (32.8) | 0.93 (0.64,1.34) | 250 (36.3)                      | 146 (29.2) | 0.59 (0.42,0.81) |
| <b>Outdoor ALAN-MSI (blue light)<sup>c</sup></b> |                              |            |                  |                                 |            |                  |
| Ref=1st tertile (lowest)                         | 187 (34.2)                   | 137 (32.3) | 1.00             | 245 (35.6)                      | 153 (30.6) | 1.00             |
| 2 <sup>nd</sup> tertile                          | 188 (34.4)                   | 135 (31.8) | 1.00 (0.71,1.41) | 234 (34.0)                      | 161 (32.2) | 1.21 (0.89,1.65) |
| 3 <sup>rd</sup> tertile (highest)                | 171 (31.3)                   | 152 (35.8) | 1.29 (0.91,1.83) | 210 (30.5)                      | 186 (37.2) | 1.74 (1.27,2.38) |

a. Basic adjustment: age, centre, educational level, night shift and menopausal status (in breast cancer) and mutually adjusted for light exposure variables.

b. Tertiles of visual for breast: 1st tert=[0.009-0.046]; 2nd tert=[0.046-0.071]; 3rd tert=[0.071-0.226]. Tertiles of visual for prostate: 1st tert=[0.002-0.0146]; 2nd tert=[0.046-0.072]; 3rd tert [0.072-0.226]

c. Tertiles of MSI for breast: 1st tert=[0.041-0.128]; 2nd tert=[0.128-0.163]; 3rd tert=[0.163-0.407]. Tertiles of MSI for prostate: 1st tert=[0.017-0.128]; 2nd tert=[0.128-0.160]; 3rd tert [0.160-0.414]

Table S5. Association of Indoor artificial light-at-night (ALAN) with breast and prostate cancer, in the total non-shift workers MCC-Spain population by chronotype

| Breast cancer          | Morning chronotype (N=971)        |            |                  | Neither Chronotype (N=1027)       |            |                  | Evening Chronotype (N=580)        |            |                   |
|------------------------|-----------------------------------|------------|------------------|-----------------------------------|------------|------------------|-----------------------------------|------------|-------------------|
|                        | Controls                          | Cases      | ORs (95%CI)      | Controls                          | Cases      | ORs (95%CI)      | Controls                          | Cases      | ORs (95%CI)       |
|                        | N (%)                             | N (%)      |                  | N (%)                             | N (%)      |                  | N (%)                             | N (%)      |                   |
| Indoor ALAN            |                                   |            |                  |                                   |            |                  |                                   |            |                   |
| Ref= Total darkness    | 71 (13,4)                         | 57 (12,9)  | 1.00             | 82 (14,8)                         | 65 (13,7)  | 1.00             | 40 (13,8)                         | 45 (15,5)  | 1.00              |
| Almost dark            | 194 (36,7)                        | 154 (34,8) | 1.04 (0.68,1.59) | 219 (39,5)                        | 184 (38,9) | 1.24 (0.83,1.84) | 117 (40,5)                        | 106 (36,4) | 0.77 (0.46,1.31)  |
| Dim light              | 184 (34,8)                        | 166 (37,6) | 1.33 (0.86,2.06) | 169 (30,5)                        | 155 (32,8) | 1.41 (0.93,2.15) | 78 (27,0)                         | 87 (29,9)  | 1.03 (0.59,1.82)  |
| Quite illuminated      | 80 (15,1)                         | 65 (14,7)  | 1.00 (0.61,1.64) | 84 (15,2)                         | 69 (14,6)  | 1.09 (0.68,1.75) | 54 (18,7)                         | 53 (18,2)  | 0.85 (0.47,1.56)  |
| <b>Prostate cancer</b> | <b>Morning chronotype (N=741)</b> |            |                  | <b>Neither Chronotype (N=547)</b> |            |                  | <b>Evening Chronotype (N=187)</b> |            |                   |
| Indoor ALAN            |                                   |            |                  |                                   |            |                  |                                   |            |                   |
| Ref= Total darkness    | 69 (16,0)                         | 44 (14,1)  | 1.00             | 41 (13,0)                         | 34 (14,7)  | 1.00             | 33 (30,6)                         | 12 (15,2)  | 1.00              |
| Almost dark            | 183 (42,6)                        | 112 (36,0) | 0.89 (0.55,1.44) | 149 (47,2)                        | 79 (34,2)  | 0.71 (0.40,1.25) | 31 (28,7)                         | 27 (34,2)  | 3.42 (1.29,9.07)  |
| Dim light              | 133 (30,9)                        | 110 (35,4) | 1.18 (0.72,1.93) | 94 (29,7)                         | 77 (33,3)  | 0.99 (0.54,1.83) | 32 (29,6)                         | 21 (26,6)  | 2.67 (0.98,7.27)  |
| Quite illuminated      | 45 (10,5)                         | 45 (14,5)  | 1.74 (0.96,3.15) | 32 (10,1)                         | 41 (17,7)  | 1.56 (0.77,3.13) | 12 (11,1)                         | 19 (24,1)  | 6.21 (2.01,19.21) |

a. Basic adjustment: age, centre, educational level and menopausal status (in breast cancer).



**Figure S1.** Classification of the ground level spectral type of the lamps<sup>a</sup> using the green to the red bands (G/R) ratio, to estimate the ground based spectrum of the melatonin suppression index (MSI). The colours indicate the visual colour of the street lights with independently of the technology used: Red/diagonal lines: monochromatic orange lights, orange/doted: no monochromatic orange lights, yellow/diagonal square net: very warm white lights, cyan/horizontal square net: white lights; dark blue/black circles with a white dot: white bluish lights; green/stars: greenish-white lights. CFL and FL are shown with the same symbol because they have the same spectral features. The diagonal line is the RANSAC linear fit to the points.

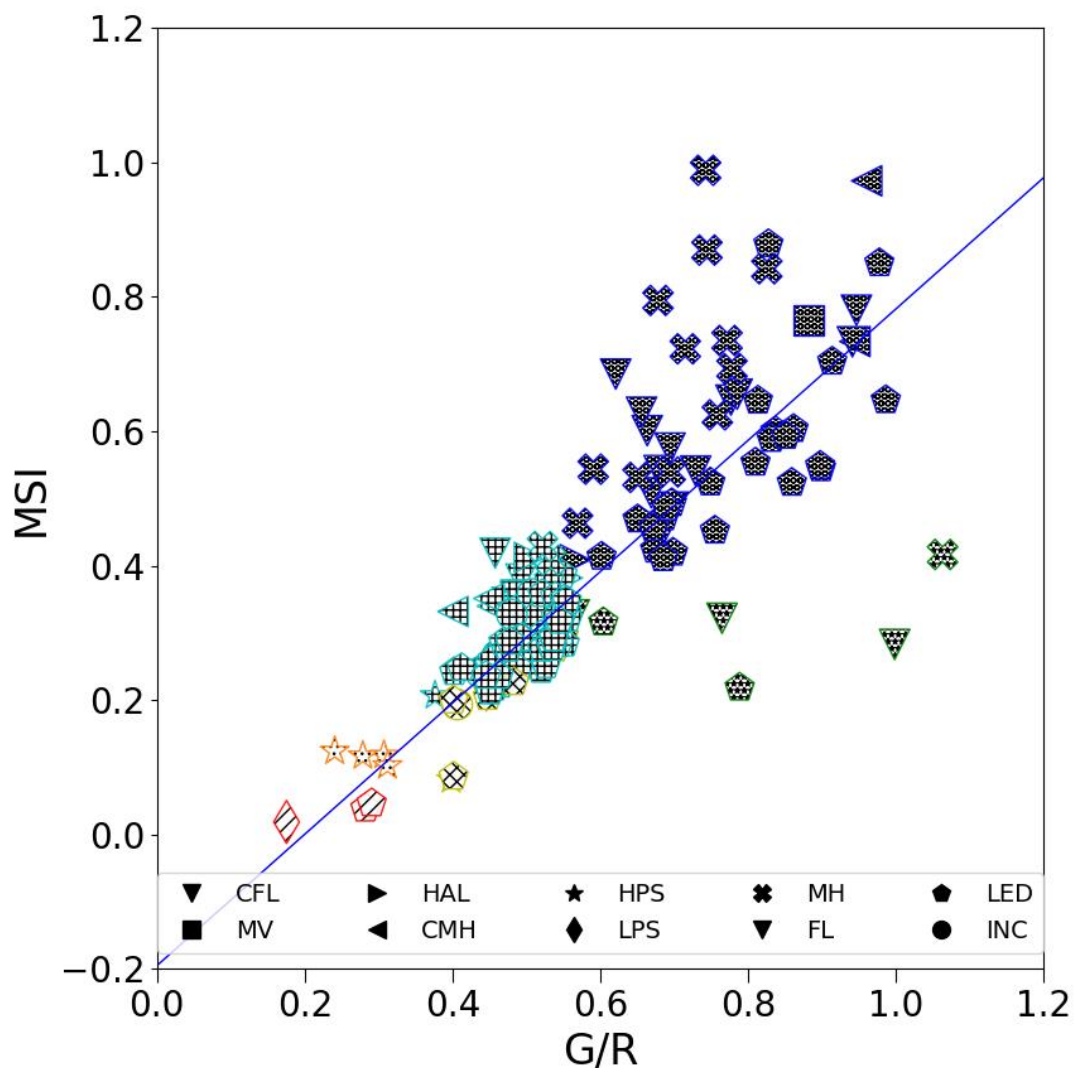

a. Different types of lamps used in the analysis: CFL=Compact Fluorescent; MV= Mercury Vapor; HAL= Halogen; MH= Metal Halide; CMH= Ceramic Metal Halide; FL=Fluorescent; LED = LED; INC = Incandescent; HPS = High Pressure Sodium; LPS = Low Pressure Sodium

**Figure S2.** Relationship between the ratio of the photopic visual light over the green band fluxes detected from the ISS ( $V(\lambda)/G$ ) to the ratio of the green to the red bands ( $G/R$ ) also detected from the ISS image to classify the lamp type. Colors indicate the visual color of the street lights independently of the technology used: red/diagonal lines: monochromatic orange lights, orange/dotted: no monochromatic orange lights, yellow/diagonal square net: very warm white lights, cyan/horizontal square net: white lights; dark blue/black circles with a white dot: white bluish lights; green/stars: greenish-white lights. The red line is a polynomial fit.

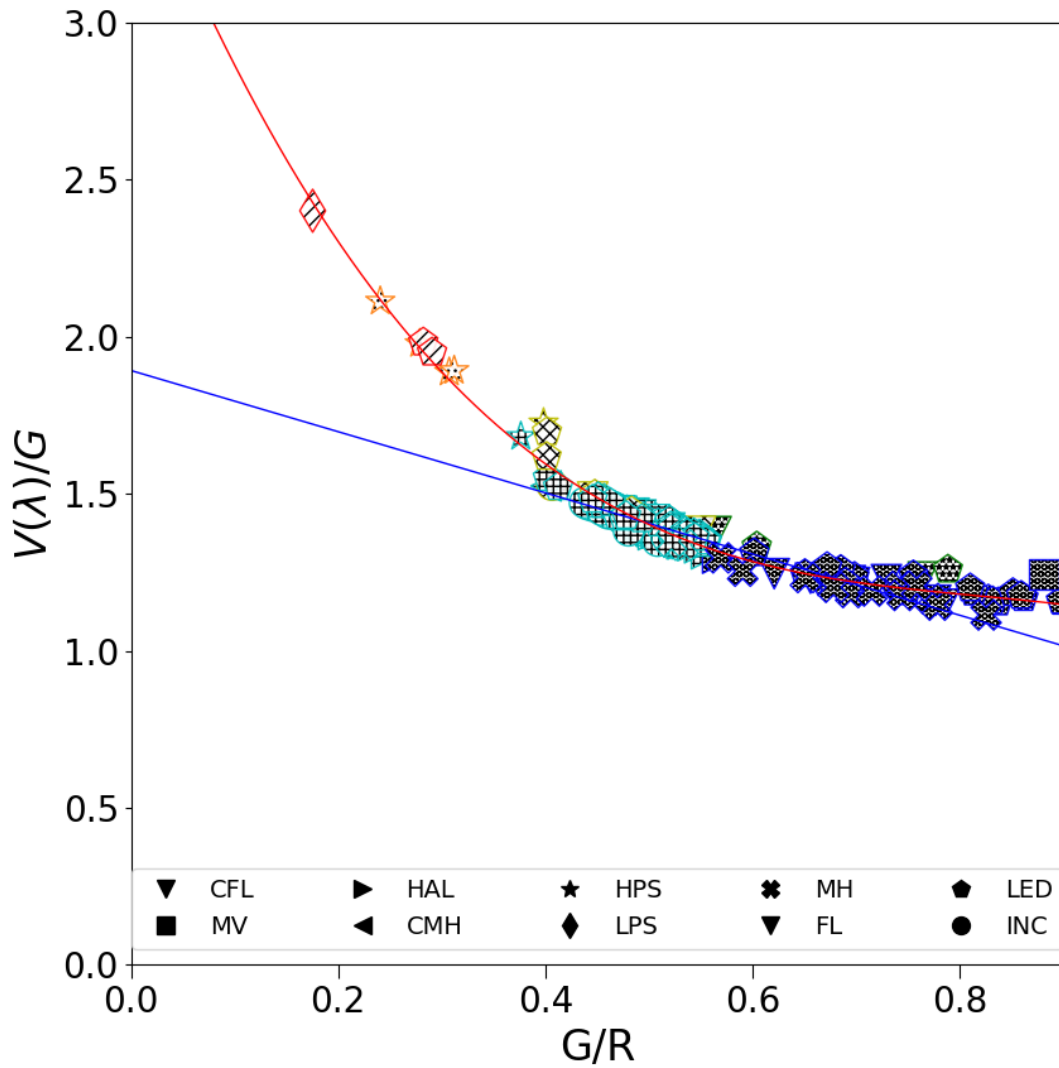

a. Different types of lamps used in the analysis: CFL=Compact Fluorescent; MV= Mercury Vapor; HAL= Halogen; MH= Metal Halide; CMH= Ceramic Metal Halide; FL=Fluorescent; LED = LED; INC = Incandescent; HPS = High Pressure Sodium; LPS = Low Pressure Sodium
